# Supplementary material for: Improving the structural stability and electrochemical performance of Na2Li2Ti6O14 nanoparticles via MgF2 coating
Source: Royal Society of Chemistry journal article supplement (doi:10.1039/c9ra02392e), 2019-01-01
Supplement: c9ra02392e1.pdf [file c9ra02392e1.pdf]

## Supplementary information

Improving the structural stability and electrochemical performance of  $\text{Na}_2\text{Li}_2\text{Ti}_6\text{O}_{14}$  particles via  $\text{MgF}_2$  coating

Wei-Wei Ma <sup>a</sup>, Hai-Tao Yu <sup>a</sup>, Chen-Feng Guo <sup>a</sup>, Ying Xie <sup>a,\*</sup>, Ning Ren <sup>b,\*</sup>, Ting-Feng Yi <sup>c,\*</sup>,

<sup>a</sup> Key Laboratory of Functional Inorganic Material Chemistry, Ministry of Education, School of Chemistry and Materials Science, Heilongjiang University, Harbin, 150080, PR China

<sup>b</sup> Zhejiang Chilwee Chuangyuan Industry Co., Ltd, Changxing, Zhejiang 313100, PR China

<sup>c</sup> School of Resources and Materials, Northeastern University at Qinhuangdao, Qinhuangdao, 066004, PR China

\*Corresponding author: Ying Xie

E-mail: [xieying@hlju.edu.cn](mailto:xieying@hlju.edu.cn) (Dr. Ying Xie).

\*Corresponding author: Ning Ren

Email: [rnm040412@163.com](mailto:rnm040412@163.com) (N. Ren);

\*Corresponding author: Ting-Feng Yi

E-mail: [tfyihit@163.com](mailto:tfyihit@163.com) (Dr. Ting-Feng Yi).

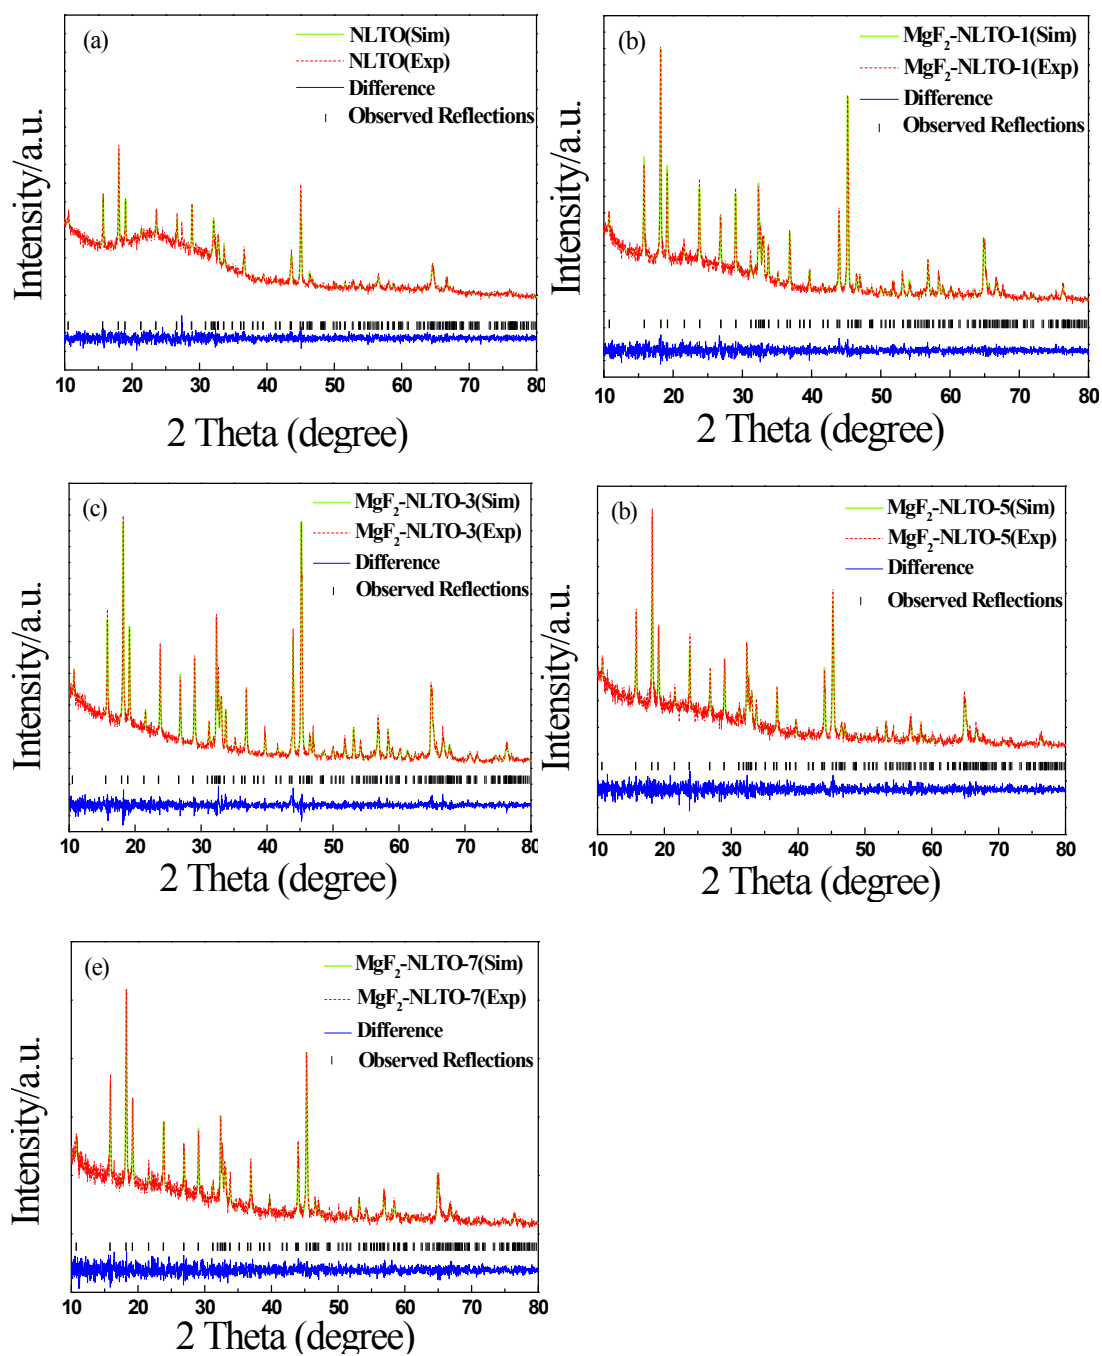

Fig. S1 Reitveld refinements for (a) NLTO, (b) MgF<sub>2</sub>-NLTO-1, (c) MgF<sub>2</sub>-NLTO-3, (d)

MgF<sub>2</sub>-NLTO-5, and (e) MgF<sub>2</sub>-NLTO-7 samples.

Table S1 Lattice constants (Å), volumes, and relevant  $R_{wp}$  calculated from Rietveld refinement for different samples.

|                          | NLTO     | MgF <sub>2</sub> -<br>NLTO-1 | MgF <sub>2</sub> -<br>NLTO-3 | MgF <sub>2</sub> -<br>NLTO-5 | MgF <sub>2</sub> -<br>NLTO-7 |
|--------------------------|----------|------------------------------|------------------------------|------------------------------|------------------------------|
| a (Å)                    | 5.737    | 5.734                        | 5.741                        | 5.739                        | 5.769                        |
| b (Å)                    | 11.2245  | 11.226                       | 11.226                       | 11.21                        | 11.221                       |
| c (Å)                    | 16.485   | 16.475                       | 16.459                       | 16.471                       | 16.521                       |
| Volume (Å <sup>3</sup> ) | 1061.503 | 1060.463                     | 1060.757                     | 1060.171                     | 1069.359                     |
| $R_{wp}$                 | 5.6%     | 10.9%                        | 9.5%                         | 8.3%                         | 11.3%                        |
| $(V_{mf}-V)/V(\%)^a$     | 0.02%    | 0.11%                        | 0.09%                        | 0.10%                        | 0.66%                        |

<sup>a</sup> The volume of NLTO is taken as the reference

Table S2 Potentials of the redox peaks (V) and the potential differences between the oxidation and reduction peaks (V) <sup>a</sup> for different samples.

| Cycle number             | Redox-potential (V)(a) |                  |                  |
|--------------------------|------------------------|------------------|------------------|
|                          | 1st                    | 2nd              | 3rd              |
| NLTO                     | 1.43/1.21 (0.22)       | 1.42/1.17 (0.25) | 1.44/1.15 (0.29) |
| MgF <sub>2</sub> -NLTO-1 | 1.33/1.21 (0.12)       | 1.35/1.19 (0.16) | 1.35/1.21 (0.14) |
| MgF <sub>2</sub> -NLTO-3 | 1.32/1.22 (0.10)       | 1.32/1.21 (0.11) | 1.32/1.21 (0.11) |
| MgF <sub>2</sub> -NLTO-5 | 1.35/1.27 (0.08)       | 1.36/1.27 (0.09) | 1.35/1.27 (0.08) |
| MgF <sub>2</sub> -NLTO-7 | 1.38/1.18 (0.20)       | 1.36/1.17 (0.19) | 1.30/1.14 (0.16) |

<sup>a</sup> The values in bracket are the potential difference between the oxidation and reduction peaks

Table S3 Warburg factors and lithium diffusion coefficients for pristine and MgF<sub>2</sub>-NLTO samples

| Sample                   | $\sigma$ ( $\Omega$ s <sup>-0.5</sup> ) | D <sub>Li</sub> (cm <sup>2</sup> s <sup>-1</sup> ) |
|--------------------------|-----------------------------------------|----------------------------------------------------|
| NLTO                     | 1471.14                                 | 3.53×10 <sup>-17</sup>                             |
| MgF <sub>2</sub> -NLTO-1 | 938.57                                  | 8.67×10 <sup>-17</sup>                             |
| MgF <sub>2</sub> -NLTO-3 | 655.30                                  | 1.78×10 <sup>-16</sup>                             |
| MgF <sub>2</sub> -NLTO-5 | 554.11                                  | 2.49×10 <sup>-16</sup>                             |
| MgF <sub>2</sub> -NLTO-7 | 1439.41                                 | 3.69×10 <sup>-17</sup>                             |
